# Supplementary material for: Rosmarinic Acid Attenuates Cadmium-Induced Nephrotoxicity via Inhibition of Oxidative Stress, Apoptosis, Inflammation and Fibrosis
Source: Int J Mol Sci. 2019 Apr 24;20(8):2027. doi: 10.3390/ijms20082027 (PMC6514581; doi:10.3390/ijms20082027)
Supplement: Supplementary file 1 [file ijms-20-02027-s001.pdf]

## Molecular docking

Molecular docking study of RA at the active site of the target proteins was analyzed with several parameters, such as Glide based docking score, hydrogen bond interaction, hydrophobic interaction, pi-pi ( $\pi$ - $\pi$ ) stacking interaction,  $\pi$ -cation, and salt bridge formation were critically checked to envisage the binding affinities and anticipating possible molecular alignment map (Supplementary table 1). The possible interactions of RA with Bad, Bcl-2, cyt c, Apaf1, caspase 9, caspase 3, caspase 8, I $\kappa$ B $\alpha$ , NF- $\kappa$ B, PKC- $\delta$ , TNFR2, TGF- $\beta$ 1, , SMAD3, and E-cadherin. Selective receptors/proteins were retrieved from the publicly available Protein Data Bank (Supplementary Figure 1). Molecular docking interactions between Bad and RA revealed involvement of Arg310, Arg313, and Asp317 amino acid residues in H-bond interactions. Apart from H-bond interactions, an oxygen atom participated in the salt bridge interaction with the positively charged Arg310 residue. Glide XP-based docking method revealed two numbers of H-bonds interactions between Bcl-2 protein and RA along with one  $\pi$ - $\pi$  stacking interaction with Phe101 and one  $\pi$ -cation interaction with Arg143 residue. The cyt c and RA docking interaction revealed that Ile11, Lys27, and Tyr97 residues are involved in H-bond interaction along with a salt bridge formation with hydrophilic residue Lys27. Eight numbers of H-bond interactions with four consecutive amino acid residues Gly159, Lys160, Ser161, Val162, and two aspartate residues (Asp244, Asp392) have been observed in the docked conformations of Apaf1 and RA. The binding interactions between the Apaf1 and ligand RA also possess to form  $\pi$ - $\pi$  stacking interaction with basic amino acid residue His438. The significance of  $\pi$ - $\pi$  interaction effect might have contributing to overall binding energies for stabilizing the Apaf1 and RA molecular complex which was turned out with docking score of -9.91 Kcal/mol. Caspase 9 and RA docking complex suggested that Ser236, Gln285, and Arg355 residues were participated to form H-bond formation with RA. Moreover, two other non-covalent types of interactions were also found to form with two consecutive amino acid residues Trp354 (involved in  $\pi$ - $\pi$  stacking) and Arg355 (involved in salt bridge formation). In the caspase 3-RA docking complex, two amino acid residues, Asn80 and His277 were found to be important in the H-bond interaction with -OH groups of RA. In addition,  $\pi$ -cation interaction was formed between the Lys82 residue of caspase 3 and catechol ring of RA. The molecular docking interaction analysis between caspase 8 and RA revealed H-bond interactions with Tyr334, Glu396, and Thr467 amino acid residues. Caspase 8 and RA docking interaction also suggested to form  $\pi$ - $\pi$  stacking interaction with hydrophobic residue Phe399. I $\kappa$ B $\alpha$  and RA docking complex was formed via total four numbers of molecular interactions, such as three numbers of H-bonding with amino acid residues of Gln112, Thr121, and Glu153 and one salt bridge formation with I $\kappa$ B $\alpha$  residue of Arg143. The NF- $\kappa$ B and RA docking interaction revealed that Arg57, Arg59, His67, Asp274, and Lys275 residues are involved in H-bond. In addition, hydrophobic amino acid residue Phe56 formed  $\pi$ - $\pi$  stacking interaction and Lys244 residue participated in salt bridge formation with RA. With PKC- $\delta$  protein, only a single amino acid residue was found to form two H-bond interactions with RA to obtain a moderate dock score value of -6.06 Kcal/mol. Although, a series of prominent hydrophobic amino acids (Pro26, Phe27, Cys28, Ala29, Tyr52, and Pro53 etc.) have been found in surrounding radius for showing hydrophobic interactions between RA and PKC- $\delta$ . The binding interactions of with TNFR2 showed the involvements of three amino acid residues (Ser107, Lys108 and Glu133) in H-bond formation with docking score -4.02 Kcal/mol. In silico docking analysis of TGF- $\beta$ 1 and RA revealed bit lower docking score of -3.91 Kcal/mol, producing three H-bond interactions with two polar amino acid residues (Asn42, Asn103), where Asn42 has participated to form double H-bond interactions with OH group in RA. The RA showed moderate binding affinity potential towards active site of SMAD3 protein, as observed from its docking score value of -6.20

Kcal/mol. The SMAD3-RA docking complex revealed that amino acid residues are at close proximity i.e. Thr366, Arg367 and a polar residue Gln315 of SMAD3 protein have found to form three H-bond interactions along with a salt bridge formation with common residue Arg367. The transmembrane glycoprotein, E-cadherin, produced total five numbers of H-bond interactions with the docking score of -5.44 Kcal/mol. Four negatively charged aspartate residues, such as Asp100, Asp136, Asp137, and Asp138 and a positively charged Arg68 residue have been found to participate in H-bond interaction. Here, the interesting point to be noticed in the molecular interaction map that all aspartate amino acid residues interacted with OH group of RA irrespective of their close proximity. One  $\pi$ -cation interaction is also found between cationic side-chain residue of Arg68 and E-cadherin protein, which clearly demonstrated the importance of this non-covalent binding interaction relevant for exhibiting necessary biological functions during ligand-protein interaction.

**Supplementary Table 1.** Dock score, emodel value and interacting residues in molecular docking analysis of different bioactive proteins with RA.

| Sl. No. | Proteins               | Glide docking score (Kcal/mol) | Glide emodel values | Interacting residues in H-bond interaction        | Other interactions [pi-pi ( $\pi$ - $\pi$ )/<br>pi-cation( $\pi$ -cation)/salt bridge] |
|---------|------------------------|--------------------------------|---------------------|---------------------------------------------------|----------------------------------------------------------------------------------------|
| 1       | Bad                    | -4.50                          | -39.37              | Arg310, Arg313, Asp317                            | Arg310<br>(salt bridge)                                                                |
| 2       | Bcl-2                  | -5.62                          | -44.44              | Asn140, Gly142                                    | Phe101 ( $\pi$ - $\pi$ ) /<br>Arg143 ( $\pi$ -cation)                                  |
| 3       | Cyt C                  | -5.81                          | -39.28              | Ile11, Lys27, Tyr97                               | Lys27 (salt bridge)                                                                    |
| 4       | Apaf1                  | -9.91                          | -89.33              | Gly159, Lys160, Ser161, Val162,<br>Asp244, Asp392 | His438 ( $\pi$ - $\pi$ )                                                               |
| 5       | Caspase 9              | -6.20                          | -54.26              | Ser236, Gln285, Arg355                            | Trp354 ( $\pi$ - $\pi$ ) /<br>Arg355 (salt bridge)                                     |
| 6       | Caspase 3              | -4.81                          | -45.91              | Asn80, His277                                     | Lys82 ( $\pi$ -cation)                                                                 |
| 7       | Caspase 8              | -5.31                          | -45.49              | Tyr334, Glu396, Thr467                            | Phe399 ( $\pi$ - $\pi$ )                                                               |
| 8       | I $\kappa$ -B $\alpha$ | -2.73                          | -26.73              | Gln112, Thr121, Glu153                            | Arg143(salt bridge)                                                                    |
| 9       | NF- $\kappa$ B         | -6.01                          | -47.24              | Arg57, Arg59, His67, Asp274,<br>Lys275            | Lys244 (salt bridge) / Phe56 ( $\pi$ - $\pi$ )                                         |
| 10      | PKC- $\delta$          | -6.06                          | -35.26              | Ala23                                             | -                                                                                      |
| 11      | TNFR2                  | -4.02                          | -41.03              | Ser107, Lys108, Glu133                            | -                                                                                      |
| 12      | TGF- $\beta$ 1         | -3.91                          | -40.15              | Asn42, Asn103                                     | -                                                                                      |
| 13      | SMAD3                  | -6.2                           | -40.04              | Thr366, Arg367, Gln315                            | Arg367(salt bridge)                                                                    |
| 14      | E-cadherin             | -5.44                          | -42.44              | Arg68, Asp100, Asp136, Asp137,<br>Asp138          | Arg68 ( $\pi$ -cation)                                                                 |



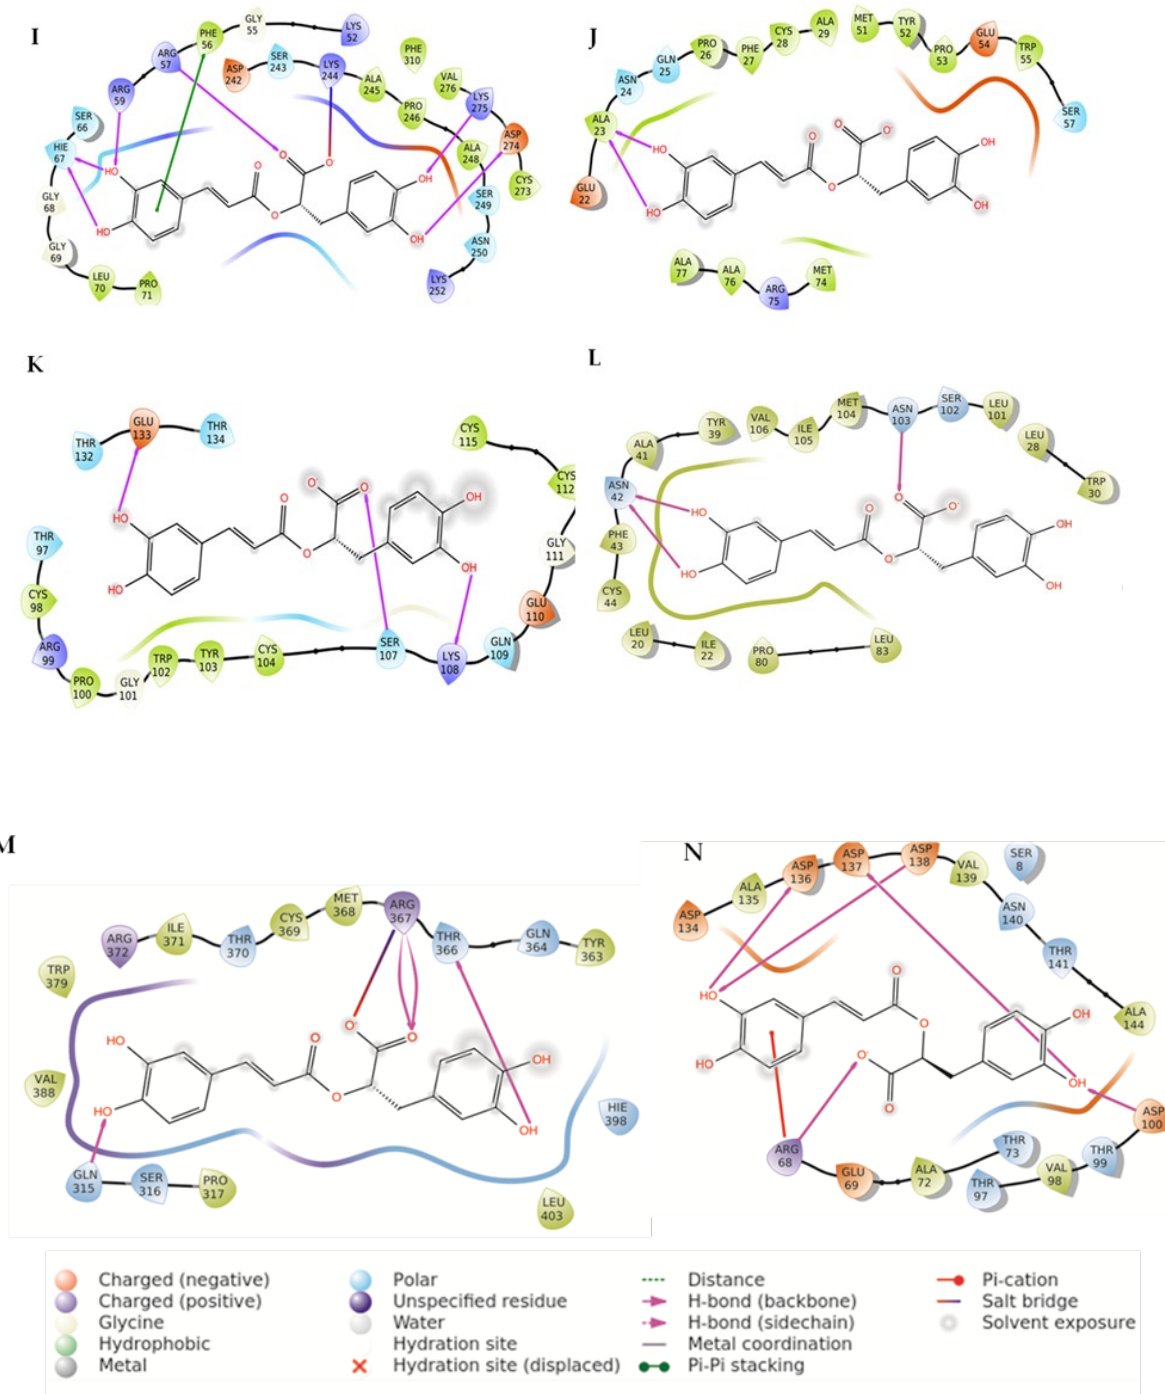

**Supplementary Figure 1.** Docking interactions of RA with Bad (A), Bcl-2 (B), cyt c (C), Apaf1 (D), caspase 9 (E), caspase 3 (F), caspase 8 (G), I $\kappa$ B $\alpha$  (H), NF- $\kappa$ B (I), PKC- $\delta$  (J), TNFR2 (K), TGF- $\beta$ 1, (L), SMAD3 (M), and E-cadherin (N). Selective receptors/proteins were retrieved from the publicly available Protein Data Bank (PDB).

### Effect on the expressions of MAPKs and iNOS in vitro and in vivo

In in vitro assay, CdCl<sub>2</sub> (40  $\mu$ M) caused significant activation of p38 and JNK MAPK signaling, which was visualized from significant ( $p < 0.01$ ) up-regulation in the expressions of phospho-p38 and phospho-JNK in CdCl<sub>2</sub>-exposed murine renal cells (Supplementary Figure 2A). On the other hand,

incubation of mouse proximal tubular epithelial cells with RA (40  $\mu$ M) 1 h prior to CdCl<sub>2</sub> (40  $\mu$ M) treatment significantly ( $p < 0.01$ ) reciprocated p38 and JNK activation in mouse renal cells (Supplementary Figure 2A). CdCl<sub>2</sub> (40  $\mu$ M) treatment to mouse proximal tubular epithelial cells significantly activated ( $p < 0.01$ ) p53 and iNOS expressions in mouse proximal tubular epithelial cells; however, incubation of mouse renal cells with RA (40  $\mu$ M) 1 h prior to CdCl<sub>2</sub> (40  $\mu$ M) treatment significantly attenuated ( $p < 0.01$ ) p53 and iNOS expressions (Supplementary Figure 2A). In this study, CdCl<sub>2</sub> (4 mg/kg) treatment for 2 weeks significantly activated p38 and JNK MAPK signaling in mouse kidneys, which was visualized from significant ( $p < 0.01$ ) up-regulation in the expressions of phospho-p38 and phospho-JNK in the kidneys of CdCl<sub>2</sub>-treated experimental mice (Supplementary Figure 2B). On the other hand, RA (4 mg/kg) treatment significantly reciprocated p38 and JNK activation in the kidneys of experimental mice (Supplementary Figure 2B). CdCl<sub>2</sub> (4 mg/kg) treatment further caused significant ( $p < 0.01$ ) activation of p53 and iNOS expressions in the kidneys of experimental mice (Figure 11). On the other hand, RA (4 mg/kg) treatment significantly reduced p53 ( $p < 0.05$ ) and iNOS ( $p < 0.01$ ) expressions in the kidneys of experimental mice (Supplementary Figure 2B).

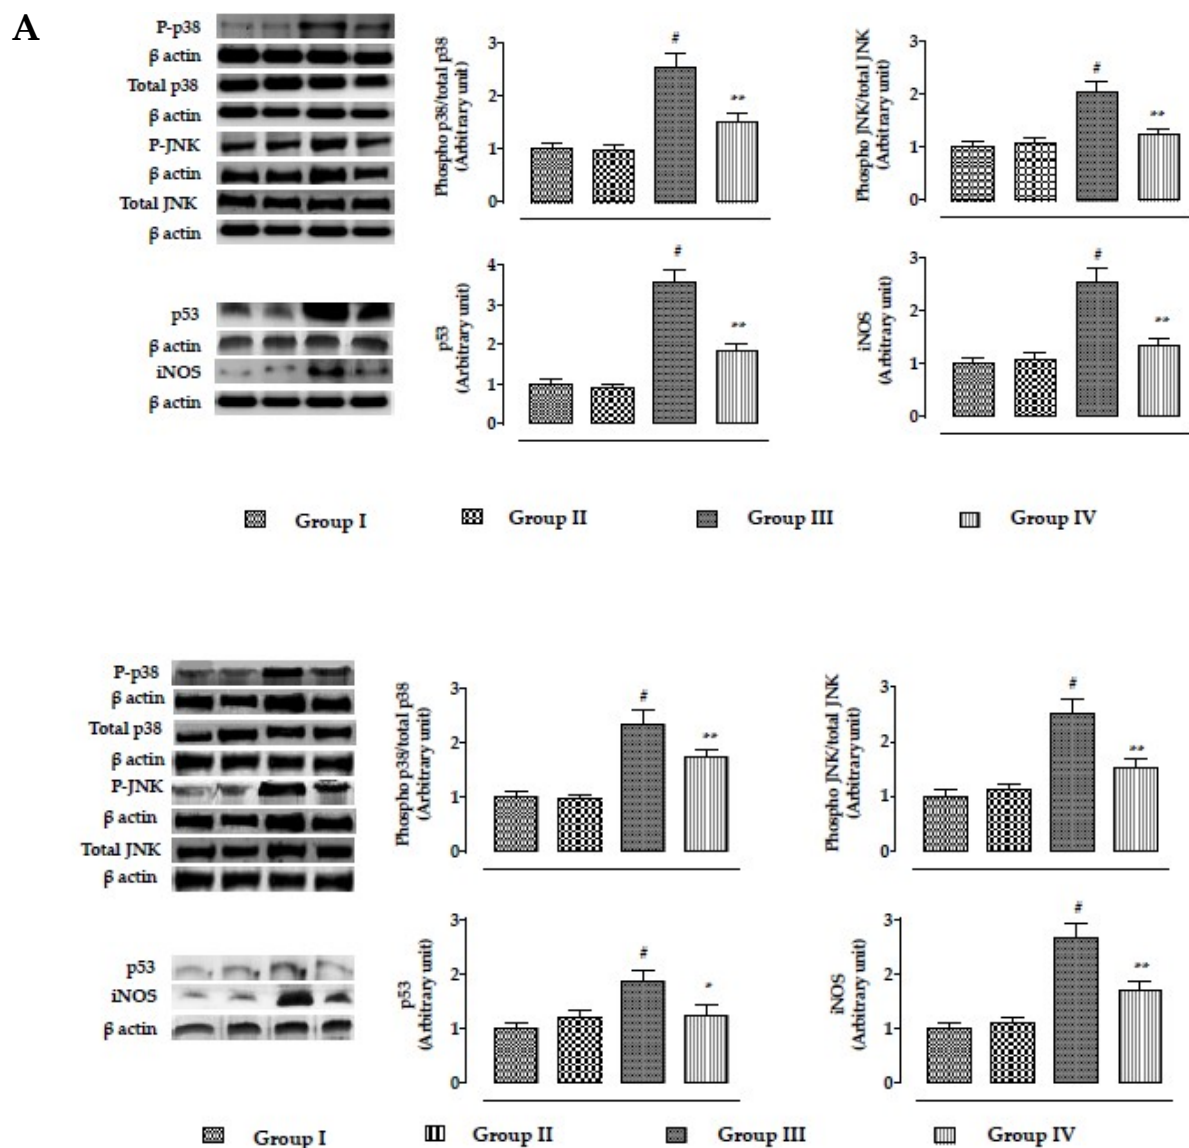

**Supplementary Figure 2.** The effects on MAPKs, and iNOS expressions in the absence (CdCl<sub>2</sub>) and presence of RA (CdCl<sub>2</sub> + RA) in vitro (A) and in vivo (B). The relative band intensities were assessed

and the intensity of normal control band was allotted 1.  $\beta$ -actin served as loading control. Data were represented as mean  $\pm$  SD, n = 3, (in vitro) or n = 6 (in vivo). \*Values significantly (p < 0.01) differ from normal control. \*Values significantly (p < 0.05) differ from CdCl<sub>2</sub> control. \*\*Values significantly (p < 0.01) differ from CdCl<sub>2</sub> control.
